# Supplementary material for: A 40-year-old man with bicuspid aortic valve and huge LV
Source: HighWire-hosted journal article supplement (doi:10.1136/heartjnl-2014-306868), 2015-06-10
Supplement: heartjnl-2014-306868supp_video-legends.pdf [file heartjnl-2014-306868supp_video-legends.pdf]

**Video 1** Long axis transthoracic imaging of the aortic valve.
